# Supplementary material
Source: publisher figshare collection journal article supplement (https://sage.figshare.com/ndownloader/files/19146416)
Supplement: Supplementary file 1 [file 19146416]

**Supplementary Figure 1: Flow diagram for survey of HPV kit experiences among underscreened women in a U.S. health care system**

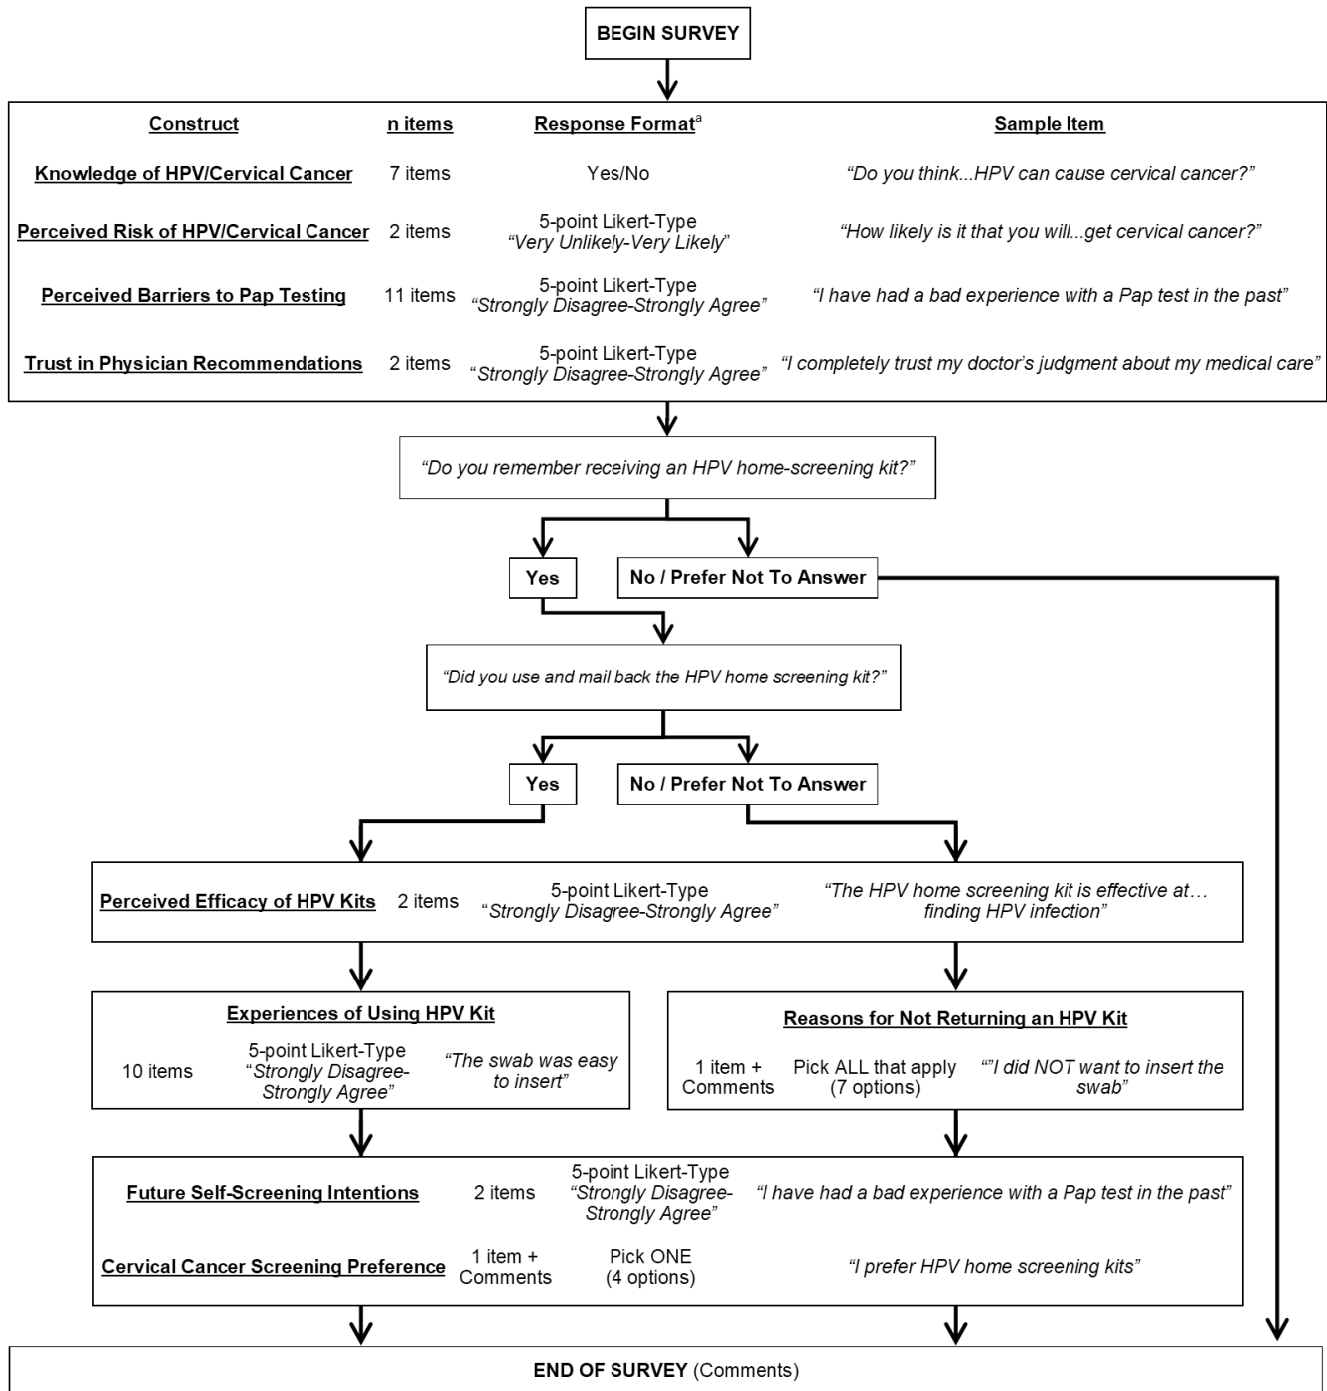

<sup>a</sup> All web survey questions included a "Prefer not to answer" option
